# Supplementary material for: Integration of Breast Cancer Secretomes with Clinical Data Elucidates Potential Serum Markers for Disease Detection, Diagnosis, and Prognosis
Source: PLoS One. 2016 Jun 29;11(6):e0158296. doi: 10.1371/journal.pone.0158296 (PMC4927101; doi:10.1371/journal.pone.0158296)
Supplement: S2 Table — The number of SCs and NSAF normalized data for each protein identified in the CM of each cell line is indicated. (XLSX) [file pone.0158296.s002.xlsx]

## Sheet: Sheet1
Supplementary Table 2. MS data derived from the CM of BC and MCF-10A cells. The number of SCs and NSAF normalization data for each protein identified in the CM of each cell line is indicated.
Uniprot	Protein and gene name	DT22	DT28	MDA-MB-231	MCF-7	MCF-10A	DT22 NSAF	DT28 NSAF	MDA-MB-231 NSAF	MCF-7 NSAF	MCF-10A NSAF
Q15582	Transforming growth factor-beta-induced protein ig-h3 OS=Homo sapiens GN=TGFBI PE=1 SV=1	0	0	9	0	119	0	0	0.00091978	0	0.0142097
P07996	Thrombospondin-1 OS=Homo sapiens GN=THBS1 PE=1 SV=2	23	7	49	12	10	0.00169874	0.000334005	0.00292329	0.000729758	0.000697062
P01033	Metalloproteinase inhibitor 1 OS=Homo sapiens GN=TIMP1 PE=1 SV=1	6	8	18	5	8	0.00250475	0.00215755	0.00606966	0.00171863	0.00315193
P08123	Collagen alpha-2(I) chain OS=Homo sapiens GN=COL1A2 PE=1 SV=7	3	0	0	0	0	0.000189782	0	0	0	0
P61769	Beta-2-microglobulin OS=Homo sapiens GN=B2M PE=1 SV=1	19	5	15	5	9	0.0137972	0.00234566	0.00879846	0.00298955	0.00616812
P07237	Protein disulfide-isomerase OS=Homo sapiens GN=P4HB PE=1 SV=3	33	13	12	13	7	0.00561351	0.00142863	0.00164884	0.0018208	0.00112381
P68104	Elongation factor 1-alpha 1 OS=Homo sapiens GN=EEF1A1 PE=1 SV=1	13	20	16	14	8	0.00243156	0.00241674	0.00241735	0.0021561	0.00141223
P14618	Pyruvate kinase PKM OS=Homo sapiens GN=PKM PE=1 SV=4	8	10	6	20	4	0.00130191	0.00105135	0.000788713	0.0026799	0.00061436
P07339	Cathepsin D OS=Homo sapiens GN=CTSD PE=1 SV=1	2	3	28	52	0	0.000419485	0.000406504	0.00474376	0.00898027	0
P04406	Glyceraldehyde-3-phosphate dehydrogenase OS=Homo sapiens GN=GAPDH PE=1 SV=3	10	23	9	9	0	0.00257952	0.00383287	0.00187525	0.00191153	0
P01034	Cystatin-C OS=Homo sapiens GN=CST3 PE=1 SV=1	0	0	38	18	8	0	0	0.0181674	0.00877209	0.00446884
P11142	Heat shock cognate 71 kDa protein OS=Homo sapiens GN=HSPA8 PE=1 SV=1	12	9	6	7	6	0.00160521	0.00077777	0.000648307	0.00077099	0.000757489
P12109	Collagen alpha-1(VI) chain OS=Homo sapiens GN=COL6A1 PE=1 SV=3	7	0	4	0	3	0.000588422	0	0.0002716	0	0.000238005
P01011	Alpha-1-antichymotrypsin OS=Homo sapiens GN=SERPINA3 PE=1 SV=2	0	0	0	30	0	0	0	0	0.0050462	0
Q9BTM1	Histone H2A.J OS=Homo sapiens GN=H2AFJ PE=1 SV=1	0	9	11	2	10	0	0.00389488	0.00595203	0.00110312	0.00632219
P62937	Peptidyl-prolyl cis-trans isomerase A OS=Homo sapiens GN=PPIA PE=1 SV=2	16	17	4	10	4	0.00837954	0.00575183	0.00169215	0.00431221	0.00197712
P05121	Plasminogen activator inhibitor 1 OS=Homo sapiens GN=SERPINE1 PE=1 SV=1	0	0	11	0	0	0	0	0.00190998	0	0
O00391	Sulfhydryl oxidase 1 OS=Homo sapiens GN=QSOX1 PE=1 SV=3	2	3	19	11	2	0.000231363	0.000224203	0.0017754	0.00104774	0.000218357
P24821	Tenascin OS=Homo sapiens GN=TNC PE=1 SV=3	45	3	0	0	0	0.00176676	7.60926e-05	0	0	0
P02452	Collagen alpha-1(I) chain OS=Homo sapiens GN=COL1A1 PE=1 SV=5	0	0	0	2	0	0	0	0	9.72013e-05	0
Q02809	Procollagen-lysine,2-oxoglutarate 5-dioxygenase 1 OS=Homo sapiens GN=PLOD1 PE=1 SV=2	8	0	11	4	3	0.00095091	0	0.00105614	0.000391479	0.000336546
Q9Y4K0	Lysyl oxidase homolog 2 OS=Homo sapiens GN=LOXL2 PE=1 SV=1	0	11	13	0	4	0	0.000793401	0.00117237	0	0.000421479
P07585	Decorin OS=Homo sapiens GN=DCN PE=1 SV=1	0	0	3	0	7	0	0	0.000583296	0	0.00159023
P22692	Insulin-like growth factor-binding protein 4 OS=Homo sapiens GN=IGFBP4 PE=1 SV=2	0	0	19	0	0	0	0	0.00514039	0	0
Q05639	Elongation factor 1-alpha 2 OS=Homo sapiens GN=EEF1A2 PE=1 SV=1	5	2	9	5	4	0.000933196	0.000241152	0.00135682	0.000768373	0.00070459
P25311	Zinc-alpha-2-glycoprotein OS=Homo sapiens GN=AZGP1 PE=1 SV=2	5	2	0	41	0	0.0014499	0.000374675	0	0.00978928	0
P16870	Carboxypeptidase E OS=Homo sapiens GN=CPE PE=1 SV=1	0	0	0	37	0	0	0	0	0.00553067	0
P07197	Neurofilament medium polypeptide OS=Homo sapiens GN=NEFM PE=1 SV=3	0	3	13	0	0	0	0.000182838	0.000990627	0	0
P08572	Collagen alpha-2(IV) chain OS=Homo sapiens GN=COL4A2 PE=1 SV=4	10	0	2	3	3	0.000504755	0	8.15433e-05	0.000124681	0.000142914
P07602	Prosaposin OS=Homo sapiens GN=PSAP PE=1 SV=2	15	8	6	0	0	0.00247368	0.000852315	0.000799249	0	0
P07737	Profilin-1 OS=Homo sapiens GN=PFN1 PE=1 SV=2	5	4	9	3	0	0.00308621	0.00159505	0.00448721	0.00152467	0
P18065	Insulin-like growth factor-binding protein 2 OS=Homo sapiens GN=IGFBP2 PE=1 SV=2	4	0	0	14	0	0.00106356	0	0	0.00306498	0
P60174	Triosephosphate isomerase OS=Homo sapiens GN=TPI1 PE=1 SV=3	5	6	2	6	2	0.00151073	0.00117119	0.00048812	0.00149269	0.000570324
Q9Y490	Talin-1 OS=Homo sapiens GN=TLN1 PE=1 SV=3	12	3	6	0	0	0.000408094	6.5911e-05	0.00016482	0	0
P0DJI8	Serum amyloid A-1 protein OS=Homo sapiens GN=SAA1 PE=1 SV=1	0	0	24	0	0	0	0	0.0137314	0	0
P02461	Collagen alpha-1(III) chain OS=Homo sapiens GN=COL3A1 PE=1 SV=4	3	0	0	0	0	0.000176836	0	0	0	0
Q99715	Collagen alpha-1(XII) chain OS=Homo sapiens GN=COL12A1 PE=1 SV=2	8	0	12	0	0	0.000225698	0	0.000273462	0	0
P09382	Galectin-1 OS=Homo sapiens GN=LGALS1 PE=1 SV=2	5	5	0	0	2	0.00320052	0.00206765	0	0	0.00120824
P05546	Heparin cofactor 2 OS=Homo sapiens GN=SERPIND1 PE=1 SV=3	7	0	2	6	4	0.00121222	0	0.000279764	0.000855528	0.000653758
P08238	Heat shock protein HSP 90-beta OS=Homo sapiens GN=HSP90AB1 PE=1 SV=4	2	4	2	9	2	0.000238713	0.000308434	0.000192821	0.000884479	0.000225294
Q12841	Follistatin-related protein 1 OS=Homo sapiens GN=FSTL1 PE=1 SV=1	3	0	3	0	0	0.000841695	0	0.000679881	0	0
P35442	Thrombospondin-2 OS=Homo sapiens GN=THBS2 PE=1 SV=2	0	0	0	0	2	0	0	0	0	0.000139175
P43243	Matrin-3 OS=Homo sapiens GN=MATR3 PE=1 SV=2	5	7	5	6	3	0.000510118	0.000461377	0.000412049	0.000504024	0.000288865
Q16270	Insulin-like growth factor-binding protein 7 OS=Homo sapiens GN=IGFBP7 PE=1 SV=1	0	0	11	0	0	0	0	0.00272274	0	0
Q01082	Spectrin beta chain, non-erythrocytic 1 OS=Homo sapiens GN=SPTBN1 PE=1 SV=2	4	4	3	2	6	0.000146217	9.44613e-05	8.85801e-05	6.01958e-05	0.000206996
P04075	Fructose-bisphosphate aldolase A OS=Homo sapiens GN=ALDOA PE=1 SV=2	2	6	3	12	0	0.000474802	0.000920219	0.000575284	0.00234565	0
P00558	Phosphoglycerate kinase 1 OS=Homo sapiens GN=PGK1 PE=1 SV=3	4	6	0	12	0	0.000828911	0.000803261	0	0.00204752	0
P09341	Growth-regulated alpha protein OS=Homo sapiens GN=CXCL1 PE=1 SV=1	0	0	6	0	0	0	0	0.00391408	0	0
P41219	Peripherin OS=Homo sapiens GN=PRPH PE=1 SV=2	6	0	2	4	2	0.00110316	0	0.000297026	0.000605544	0.000347048
P23528	Cofilin-1 OS=Homo sapiens GN=CFL1 PE=1 SV=3	2	2	0	10	0	0.00104113	0.00067261	0	0.00428623	0
P07093	Glia-derived nexin OS=Homo sapiens GN=SERPINE2 PE=1 SV=1	0	2	0	0	0	0	0.000280536	0	0	0
P07900	Heat shock protein HSP 90-alpha OS=Homo sapiens GN=HSP90AA1 PE=1 SV=5	4	3	0	3	0	0.000472208	0.000228798	0	0.000291604	0
Q08380	Galectin-3-binding protein OS=Homo sapiens GN=LGALS3BP PE=1 SV=1	0	0	20	0	0	0	0	0.00238636	0	0
P02679	Fibrinogen gamma chain OS=Homo sapiens GN=FGG PE=1 SV=3	7	4	2	3	5	0.00133532	0.00049295	0.000308173	0.000471201	0.00090018
P09429	High mobility group protein B1 OS=Homo sapiens GN=HMGB1 PE=1 SV=3	0	3	0	0	2	0	0.000778976	0	0	0.000758663
Q16363	Laminin subunit alpha-4 OS=Homo sapiens GN=LAMA4 PE=1 SV=4	4	2	2	0	0	0.000189608	6.1247e-05	7.65783e-05	0	0
P18669	Phosphoglycerate mutase 1 OS=Homo sapiens GN=PGAM1 PE=1 SV=2	4	0	2	3	2	0.00136085	0	0.000549615	0.000840371	0.000642175
Q15233	Non-POU domain-containing octamer-binding protein OS=Homo sapiens GN=NONO PE=1 SV=4	3	0	4	3	2	0.000550407	0	0.000592791	0.000453194	0.000346311
P54652	Heat shock-related 70 kDa protein 2 OS=Homo sapiens GN=HSPA2 PE=1 SV=1	4	6	3	3	3	0.000540933	0.000524194	0.000327705	0.000334044	0.000382893
P50395	Rab GDP dissociation inhibitor beta OS=Homo sapiens GN=GDI2 PE=1 SV=2	8	4	4	0	2	0.00155351	0.000501812	0.000627426	0	0.000366545
Q6PEY2	Tubulin alpha-3E chain OS=Homo sapiens GN=TUBA3E PE=1 SV=2	7	6	2	2	0	0.00134422	0.000744355	0.000310227	0.000316228	0
P02647	Apolipoprotein A-I OS=Homo sapiens GN=APOA1 PE=1 SV=1	12	0	0	0	0	0.00388377	0	0	0	0
P0DJI9	Serum amyloid A-2 protein OS=Homo sapiens GN=SAA2 PE=1 SV=1	0	0	19	0	0	0	0	0.0108707	0	0
P08519	Apolipoprotein(a) OS=Homo sapiens GN=LPA PE=1 SV=1	6	5	2	2	0	0.000114003	6.13749e-05	3.06953e-05	3.12891e-05	0
Q00610	Clathrin heavy chain 1 OS=Homo sapiens GN=CLTC PE=1 SV=5	0	4	2	0	8	0	0.000133317	8.33446e-05	0	0.000389522
P68366	Tubulin alpha-4A chain OS=Homo sapiens GN=TUBA4A PE=1 SV=1	8	6	3	0	0	0.00154311	0.000747678	0.000467418	0	0
Q8NBP7	Proprotein convertase subtilisin/kexin type 9 OS=Homo sapiens GN=PCSK9 PE=1 SV=3	0	0	10	0	0	0	0	0.00100869	0	0
Q15084	Protein disulfide-isomerase A6 OS=Homo sapiens GN=PDIA6 PE=1 SV=1	4	2	0	2	3	0.000785582	0.000253757	0	0.000323415	0.000556065
P06733	Alpha-enolase OS=Homo sapiens GN=ENO1 PE=1 SV=2	2	7	5	3	0	0.000398221	0.000900429	0.00080416	0.00049183	0
P06744	Glucose-6-phosphate isomerase OS=Homo sapiens GN=GPI PE=1 SV=4	2	3	0	7	0	0.000309728	0.000300143	0	0.00089258	0
P24593	Insulin-like growth factor-binding protein 5 OS=Homo sapiens GN=IGFBP5 PE=1 SV=1	10	0	0	5	0	0.00317698	0	0	0.00130793	0
P32119	Peroxiredoxin-2 OS=Homo sapiens GN=PRDX2 PE=1 SV=5	0	3	0	4	0	0	0.000845858	0	0.0014374	0
Q06830	Peroxiredoxin-1 OS=Homo sapiens GN=PRDX1 PE=1 SV=1	0	11	0	3	0	0	0.00308589	0	0.00107263	0
P38159	RNA-binding motif protein, X chromosome OS=Homo sapiens GN=RBMX PE=1 SV=3	2	0	2	0	2	0.000442015	0	0.000357039	0	0.000417168
P18206	Vinculin OS=Homo sapiens GN=VCL PE=1 SV=4	3	0	4	2	0	0.000228608	0	0.000246212	0.000125487	0
P31943	Heterogeneous nuclear ribonucleoprotein H OS=Homo sapiens GN=HNRNPH1 PE=1 SV=4	5	0	2	2	0	0.000962294	0	0.000310918	0.000316933	0
P00736	Complement C1r subcomponent OS=Homo sapiens GN=C1R PE=1 SV=2	2	0	0	0	0	0.000245146	0	0	0	0
P58215	Lysyl oxidase homolog 3 OS=Homo sapiens GN=LOXL3 PE=2 SV=1	0	0	4	2	6	0	0	0.000370789	0.000188981	0.000649851
P62805	Histone H4 OS=Homo sapiens GN=HIST1H4A PE=1 SV=2	5	6	0	0	0	0.00419485	0.00325204	0	0	0
P05783	Keratin, type I cytoskeletal 18 OS=Homo sapiens GN=KRT18 PE=1 SV=2	0	0	0	16	0	0	0	0	0.00264749	0
P16070	CD44 antigen OS=Homo sapiens GN=CD44 PE=1 SV=3	8	2	0	0	3	0.000931687	0.000150476	0	0	0.000329742
P05787	Keratin, type II cytoskeletal 8 OS=Homo sapiens GN=KRT8 PE=1 SV=7	0	0	0	17	3	0	0	0	0.00250429	0.000506561
P61978	Heterogeneous nuclear ribonucleoprotein K OS=Homo sapiens GN=HNRNPK PE=1 SV=1	8	2	2	2	2	0.00149311	0.000241152	0.000301517	0.000307349	0.000352295
P62258	14-3-3 protein epsilon OS=Homo sapiens GN=YWHAE PE=1 SV=1	2	0	3	4	2	0.000677757	0	0.000821189	0.0011161	0.000639657
P10809	60 kDa heat shock protein, mitochondrial OS=Homo sapiens GN=HSPD1 PE=1 SV=2	6	0	0	4	0	0.000904858	0	0	0.000496694	0
P12273	Prolactin-inducible protein OS=Homo sapiens GN=PIP PE=1 SV=1	0	0	0	25	0	0	0	0	0.0121835	0
P61981	14-3-3 protein gamma OS=Homo sapiens GN=YWHAG PE=1 SV=2	0	8	4	0	0	0	0.00180815	0.00113038	0	0
P02538	Keratin, type II cytoskeletal 6A OS=Homo sapiens GN=KRT6A PE=1 SV=3	0	3	0	0	5	0	0.00029695	0	0	0.000723017
P31150	Rab GDP dissociation inhibitor alpha OS=Homo sapiens GN=GDI1 PE=1 SV=2	4	0	3	0	2	0.000773279	0	0.000468464	0	0.000364905
P00751	Complement factor B OS=Homo sapiens GN=CFB PE=1 SV=2	0	0	6	3	5	0	0	0.000548176	0.00027939	0.000533745
P30101	Protein disulfide-isomerase A3 OS=Homo sapiens GN=PDIA3 PE=1 SV=4	3	0	2	2	3	0.00051335	0	0.00027644	0.000281788	0.000484493
P29401	Transketolase OS=Homo sapiens GN=TKT PE=1 SV=3	0	0	3	2	0	0	0	0.000336121	0.000228415	0
P26038	Moesin OS=Homo sapiens GN=MSN PE=1 SV=3	3	2	2	0	0	0.000449293	0.000193506	0.000241945	0	0
Q12805	EGF-containing fibulin-like extracellular matrix protein 1 OS=Homo sapiens GN=EFEMP1 PE=1 SV=2	3	0	7	0	3	0.000525846	0	0.000991091	0	0.000496286
Q14766	Latent-transforming growth factor beta-binding protein 1 OS=Homo sapiens GN=LTBP1 PE=1 SV=4	0	0	4	0	4	0	0	0.000162234	0	0.000189556
O60814	Histone H2B type 1-K OS=Homo sapiens GN=HIST1H2BK PE=1 SV=3	4	4	0	0	0	0.0027433	0.00177227	0	0	0
P21810	Biglycan OS=Homo sapiens GN=BGN PE=1 SV=2	12	0	0	0	0	0.00281785	0	0	0	0
P49747	Cartilage oligomeric matrix protein OS=Homo sapiens GN=COMP PE=1 SV=2	2	0	0	0	0	0.000228306	0	0	0	0
P13647	Keratin, type II cytoskeletal 5 OS=Homo sapiens GN=KRT5 PE=1 SV=3	0	2	0	0	6	0	0.000189243	0	0	0.000829386
Q15149	Plectin OS=Homo sapiens GN=PLEC PE=1 SV=3	4	2	2	2	3	7.3795e-05	2.38372e-05	2.98041e-05	3.03806e-05	5.2235e-05
Q06481	Amyloid-like protein 2 OS=Homo sapiens GN=APLP2 PE=1 SV=2	2	0	8	0	0	0.000226511	0	0.000731859	0	0
P04114	Apolipoprotein B-100 OS=Homo sapiens GN=APOB PE=1 SV=2	7	0	4	0	0	0.000132566	0	6.11888e-05	0	0
Q02818	Nucleobindin-1 OS=Homo sapiens GN=NUCB1 PE=1 SV=4	12	0	2	0	0	0.00224939	0	0.000302825	0	0
P05067	Amyloid beta A4 protein OS=Homo sapiens GN=APP PE=1 SV=3	6	0	8	0	0	0.000673356	0	0.000725206	0	0
P13639	Elongation factor 2 OS=Homo sapiens GN=EEF2 PE=1 SV=4	4	2	0	2	0	0.000402862	0.000130132	0	0.000165854	0
P29400	Collagen alpha-5(IV) chain OS=Homo sapiens GN=COL4A5 PE=1 SV=2	2	0	0	2	0	0.000102569	0	0	8.44527e-05	0
Q15436	Protein transport protein Sec23A OS=Homo sapiens GN=SEC23A PE=1 SV=2	3	2	4	0	2	0.000338878	0.000145952	0.000364973	0	0.000213219
P34931	Heat shock 70 kDa protein 1-like OS=Homo sapiens GN=HSPA1L PE=1 SV=2	2	3	2	2	3	0.000269622	0.000261279	0.000217788	0.000222001	0.000381699
P08727	Keratin, type I cytoskeletal 19 OS=Homo sapiens GN=KRT19 PE=1 SV=4	0	9	0	7	0	0	0.0012561	0	0.00124515	0
Q13753	Laminin subunit gamma-2 OS=Homo sapiens GN=LAMC2 PE=1 SV=2	0	0	0	0	8	0	0	0	0	0.000546899
P30040	Endoplasmic reticulum resident protein 29 OS=Homo sapiens GN=ERP29 PE=1 SV=4	0	0	0	2	5	0	0	0	0.000545221	0.00156238
Q13162	Peroxiredoxin-4 OS=Homo sapiens GN=PRDX4 PE=1 SV=1	2	3	2	0	0	0.000637741	0.000618007	0.000515137	0	0
Q92945	Far upstream element-binding protein 2 OS=Homo sapiens GN=KHSRP PE=1 SV=4	6	0	2	0	0	0.000729232	0	0.000196346	0	0
O94985	Calsyntenin-1 OS=Homo sapiens GN=CLSTN1 PE=1 SV=1	2	0	0	3	0	0.000176175	0	0	0.000217588	0
O00468	Agrin OS=Homo sapiens GN=AGRN PE=1 SV=5	0	0	3	3	0	0	0	0.000101308	0.000103268	0
Q16610	Extracellular matrix protein 1 OS=Homo sapiens GN=ECM1 PE=1 SV=2	8	0	0	0	0	0.00128021	0	0	0	0
O14556	Glyceraldehyde-3-phosphate dehydrogenase, testis-specific OS=Homo sapiens GN=GAPDHS PE=1 SV=2	5	0	0	0	0	0.00105899	0	0	0	0
P35555	Fibrillin-1 OS=Homo sapiens GN=FBN1 PE=1 SV=3	0	0	5	0	0	0	0	0.000121562	0	0
Q07654	Trefoil factor 3 OS=Homo sapiens GN=TFF3 PE=1 SV=1	0	0	0	13	0	0	0	0	0.0115621	0
P55795	Heterogeneous nuclear ribonucleoprotein H2 OS=Homo sapiens GN=HNRNPH2 PE=1 SV=1	4	0	0	0	0	0.000769835	0	0	0	0
P55072	Transitional endoplasmic reticulum ATPase OS=Homo sapiens GN=VCP PE=1 SV=4	8	0	0	0	0	0.000857707	0	0	0	0
P49327	Fatty acid synthase OS=Homo sapiens GN=FASN PE=1 SV=3	0	0	0	5	0	0	0	0	0.000141679	0
Q86UP2	Kinectin OS=Homo sapiens GN=KTN1 PE=1 SV=1	0	0	2	0	4	0	0	0.000102876	0	0.000240402
Q06828	Fibromodulin OS=Homo sapiens GN=FMOD PE=1 SV=2	5	0	0	0	0	0.00114912	0	0	0	0
P62314	Small nuclear ribonucleoprotein Sm D1 OS=Homo sapiens GN=SNRPD1 PE=1 SV=1	4	0	0	0	2	0.00290467	0	0	0	0.00137069
O95084	Serine protease 23 OS=Homo sapiens GN=PRSS23 PE=1 SV=1	0	0	0	9	0	0	0	0	0.00167196	0
P40926	Malate dehydrogenase, mitochondrial OS=Homo sapiens GN=MDH2 PE=1 SV=3	2	0	0	0	2	0.000511325	0	0	0	0.000482581
Q8NBS9	Thioredoxin domain-containing protein 5 OS=Homo sapiens GN=TXNDC5 PE=1 SV=2	3	0	3	2	0	0.000600097	0	0.00048473	0.000329405	0
Q9UHD9	Ubiquilin-2 OS=Homo sapiens GN=UBQLN2 PE=1 SV=2	4	0	0	0	4	0.000553936	0	0	0	0.000522797
P35609	Alpha-actinin-2 OS=Homo sapiens GN=ACTN2 PE=1 SV=1	0	0	2	0	0	0	0	0.000156155	0	0
O94907	Dickkopf-related protein 1 OS=Homo sapiens GN=DKK1 PE=1 SV=1	2	0	10	0	0	0.000649729	0	0.0026241	0	0
O60568	Procollagen-lysine,2-oxoglutarate 5-dioxygenase 3 OS=Homo sapiens GN=PLOD3 PE=1 SV=1	6	0	0	0	0	0.000702553	0	0	0	0
Q6YHK3	CD109 antigen OS=Homo sapiens GN=CD109 PE=1 SV=2	10	0	0	0	0	0.000598021	0	0	0	0
P07355	Annexin A2 OS=Homo sapiens GN=ANXA2 PE=1 SV=2	0	0	4	2	0	0	0	0.000823612	0.000419772	0
Q13509	Tubulin beta-3 chain OS=Homo sapiens GN=TUBB3 PE=1 SV=2	4	0	3	0	0	0.000768124	0	0.000465341	0	0
Q02790	Peptidyl-prolyl cis-trans isomerase FKBP4 OS=Homo sapiens GN=FKBP4 PE=1 SV=3	3	0	0	0	0	0.000564797	0	0	0	0
P25705	ATP synthase subunit alpha, mitochondrial OS=Homo sapiens GN=ATP5A1 PE=1 SV=1	2	0	0	3	0	0.000312528	0	0	0.000385993	0
Q13751	Laminin subunit beta-3 OS=Homo sapiens GN=LAMB3 PE=1 SV=1	0	0	0	0	5	0	0	0	0	0.000347936
P30086	Phosphatidylethanolamine-binding protein 1 OS=Homo sapiens GN=PEBP1 PE=1 SV=3	0	0	4	4	0	0	0	0.00149307	0.00152195	0
P22392	Nucleoside diphosphate kinase B OS=Homo sapiens GN=NME2 PE=1 SV=1	3	2	0	0	0	0.00170554	0.000734561	0	0	0
Q9GZM7	Tubulointerstitial nephritis antigen-like OS=Homo sapiens GN=TINAGL1 PE=1 SV=1	5	0	0	0	0	0.000925203	0	0	0	0
Q14118	Dystroglycan OS=Homo sapiens GN=DAG1 PE=1 SV=2	8	0	2	0	0	0.000772415	0	0.00015598	0	0
P16035	Metalloproteinase inhibitor 2 OS=Homo sapiens GN=TIMP2 PE=1 SV=2	0	0	8	0	0	0	0	0.00253822	0	0
Q8N474	Secreted frizzled-related protein 1 OS=Homo sapiens GN=SFRP1 PE=1 SV=1	3	0	0	0	0	0.000825611	0	0	0	0
P07288	Prostate-specific antigen OS=Homo sapiens GN=KLK3 PE=1 SV=2	0	0	0	11	0	0	0	0	0.00299872	0
P17066	Heat shock 70 kDa protein 6 OS=Homo sapiens GN=HSPA6 PE=1 SV=2	0	2	0	0	2	0	0.000173644	0	0	0.000253674
P32004	Neural cell adhesion molecule L1 OS=Homo sapiens GN=L1CAM PE=1 SV=2	6	0	0	0	0	0.000412477	0	0	0	0
P26022	Pentraxin-related protein PTX3 OS=Homo sapiens GN=PTX3 PE=1 SV=3	0	0	3	0	0	0	0	0.000549615	0	0
P63104	14-3-3 protein zeta/delta OS=Homo sapiens GN=YWHAZ PE=1 SV=1	3	0	0	3	0	0.00105813	0	0	0.000871241	0
O43852	Calumenin OS=Homo sapiens GN=CALU PE=1 SV=2	8	0	0	0	0	0.00219464	0	0	0	0
Q7Z794	Keratin, type II cytoskeletal 1b OS=Homo sapiens GN=KRT77 PE=2 SV=3	2	2	0	0	4	0.00029901	0.000193172	0	0	0.000564403
P23284	Peptidyl-prolyl cis-trans isomerase B OS=Homo sapiens GN=PPIB PE=1 SV=2	7	2	0	0	0	0.00280045	0.000516913	0	0	0
Q92820	Gamma-glutamyl hydrolase OS=Homo sapiens GN=GGH PE=1 SV=2	9	4	0	0	0	0.00244568	0.000702222	0	0	0
Q14031	Collagen alpha-6(IV) chain OS=Homo sapiens GN=COL4A6 PE=2 SV=3	3	0	0	0	0	0.000153307	0	0	0	0
P09651	Heterogeneous nuclear ribonucleoprotein A1 OS=Homo sapiens GN=HNRNPA1 PE=1 SV=5	5	0	0	0	0	0.00116148	0	0	0	0
P07225	Vitamin K-dependent protein S OS=Homo sapiens GN=PROS1 PE=1 SV=1	0	0	3	0	2	0	0	0.000309768	0	0.000241291
O95678	Keratin, type II cytoskeletal 75 OS=Homo sapiens GN=KRT75 PE=1 SV=2	0	2	0	0	3	0	0.000202637	0	0	0.000444045
Q5XKE5	Keratin, type II cytoskeletal 79 OS=Homo sapiens GN=KRT79 PE=1 SV=2	0	2	0	0	3	0	0.000208698	0	0	0.000457325
Q03252	Lamin-B2 OS=Homo sapiens GN=LMNB2 PE=1 SV=3	0	0	0	0	2	0	0	0	0	0.000271854
Q13148	TAR DNA-binding protein 43 OS=Homo sapiens GN=TARDBP PE=1 SV=1	0	0	3	0	0	0	0	0.000505805	0	0
P31949	Protein S100-A11 OS=Homo sapiens GN=S100A11 PE=1 SV=2	0	4	0	0	0	0	0.00212673	0	0	0
Q9Y240	C-type lectin domain family 11 member A OS=Homo sapiens GN=CLEC11A PE=1 SV=1	0	0	0	0	2	0	0	0	0	0.000504992
P00450	Ceruloplasmin OS=Homo sapiens GN=CP PE=1 SV=1	2	0	4	0	4	0.00016228	0	0.000262164	0	0.000306315
P00338	L-lactate dehydrogenase A chain OS=Homo sapiens GN=LDHA PE=1 SV=2	0	5	0	0	0	0	0.000840762	0	0	0
Q9UBR2	Cathepsin Z OS=Homo sapiens GN=CTSZ PE=1 SV=1	0	0	10	0	0	0	0	0.00230367	0	0
P43694	Transcription factor GATA-4 OS=Homo sapiens GN=GATA4 PE=1 SV=2	0	0	2	2	0	0	0	0.000315842	0.000321952	0
O43660	Pleiotropic regulator 1 OS=Homo sapiens GN=PLRG1 PE=1 SV=1	0	0	2	0	0	0	0	0.0002716	0	0
P60660	Myosin light polypeptide 6 OS=Homo sapiens GN=MYL6 PE=1 SV=2	0	2	0	0	0	0	0.000739425	0	0	0
Q14980	Nuclear mitotic apparatus protein 1 OS=Homo sapiens GN=NUMA1 PE=1 SV=2	4	0	0	0	2	0.000163431	0	0	0	7.71218e-05
Q07954	Prolow-density lipoprotein receptor-related protein 1 OS=Homo sapiens GN=LRP1 PE=1 SV=2	2	0	2	0	0	3.80343e-05	0	3.07223e-05	0	0
Q9UBU2	Dickkopf-related protein 2 OS=Homo sapiens GN=DKK2 PE=1 SV=1	0	0	9	0	0	0	0	0.00242552	0	0
P27348	14-3-3 protein theta OS=Homo sapiens GN=YWHAQ PE=1 SV=1	0	3	2	0	0	0	0.000683591	0.000569805	0	0
P19957	Elafin OS=Homo sapiens GN=PI3 PE=1 SV=3	0	9	0	0	0	0	0.00429435	0	0	0
Q15904	V-type proton ATPase subunit S1 OS=Homo sapiens GN=ATP6AP1 PE=1 SV=2	0	0	0	5	0	0	0	0	0.00075693	0
P63241	Eukaryotic translation initiation factor 5A-1 OS=Homo sapiens GN=EIF5A PE=1 SV=2	4	0	2	0	0	0.00224452	0	0.000906508	0	0
P18428	Lipopolysaccharide-binding protein OS=Homo sapiens GN=LBP PE=1 SV=3	0	0	3	0	0	0	0	0.00043535	0	0
P35443	Thrombospondin-4 OS=Homo sapiens GN=THBS4 PE=1 SV=2	2	0	0	0	0	0.000179842	0	0	0	0
P33151	Cadherin-5 OS=Homo sapiens GN=CDH5 PE=1 SV=5	0	0	3	0	0	0	0	0.000267096	0	0
P04350	Tubulin beta-4A chain OS=Homo sapiens GN=TUBB4A PE=1 SV=2	2	0	0	0	0	0.000389252	0	0	0	0
P07195	L-lactate dehydrogenase B chain OS=Homo sapiens GN=LDHB PE=1 SV=2	2	0	0	0	0	0.000517449	0	0	0	0
O95497	Pantetheinase OS=Homo sapiens GN=VNN1 PE=1 SV=2	3	0	0	0	0	0.000505345	0	0	0	0
P01344	Insulin-like growth factor II OS=Homo sapiens GN=IGF2 PE=1 SV=1	3	0	0	0	0	0.00144023	0	0	0	0
Q32P28	Prolyl 3-hydroxylase 1 OS=Homo sapiens GN=LEPRE1 PE=1 SV=2	4	0	0	0	0	0.000469641	0	0	0	0
P01031	Complement C5 OS=Homo sapiens GN=C5 PE=1 SV=4	2	0	0	0	0	0.000103119	0	0	0	0
P31947	14-3-3 protein sigma OS=Homo sapiens GN=SFN PE=1 SV=1	0	4	0	0	0	0	0.000900429	0	0	0
Q14315	Filamin-C OS=Homo sapiens GN=FLNC PE=1 SV=3	3	0	0	0	0	9.51347e-05	0	0	0	0
P02760	Protein AMBP OS=Homo sapiens GN=AMBP PE=1 SV=1	0	0	0	0	3	0	0	0	0	0.000695082
Q5SZK8	FRAS1-related extracellular matrix protein 2 OS=Homo sapiens GN=FREM2 PE=1 SV=2	2	0	0	5	0	5.45371e-05	0	0	0.000112262	0
P02008	Hemoglobin subunit zeta OS=Homo sapiens GN=HBZ PE=1 SV=2	0	0	3	0	0	0	0	0.00147467	0	0
O00410	Importin-5 OS=Homo sapiens GN=IPO5 PE=1 SV=4	2	0	0	2	0	0.000157546	0	0	0.00012972	0
P03973	Antileukoproteinase OS=Homo sapiens GN=SLPI PE=1 SV=2	0	4	0	0	0	0	0.00169172	0	0	0
P53634	Dipeptidyl peptidase 1 OS=Homo sapiens GN=CTSC PE=1 SV=2	0	0	2	0	3	0	0	0.000301517	0	0.000528442
P08603	Complement factor H OS=Homo sapiens GN=CFH PE=1 SV=4	0	0	2	0	0	0	0	0.000113406	0	0
P26368	Splicing factor U2AF 65 kDa subunit OS=Homo sapiens GN=U2AF2 PE=1 SV=4	4	3	0	0	0	0.000727697	0.000352589	0	0	0
P08476	Inhibin beta A chain OS=Homo sapiens GN=INHBA PE=1 SV=2	5	0	0	0	0	0.00101425	0	0	0	0
Q9BQT9	Calsyntenin-3 OS=Homo sapiens GN=CLSTN3 PE=1 SV=1	0	0	0	3	0	0	0	0	0.000223278	0
O76076	WNT1-inducible-signaling pathway protein 2 OS=Homo sapiens GN=WISP2 PE=1 SV=1	0	0	0	6	0	0	0	0	0.00170763	0
P35637	RNA-binding protein FUS OS=Homo sapiens GN=FUS PE=1 SV=1	0	0	2	0	0	0	0	0.000265403	0	0
Q7Z5J8	Ankyrin and armadillo repeat-containing protein OS=Homo sapiens GN=ANKAR PE=2 SV=3	0	0	0	2	0	0	0	0	9.92348e-05	0
P17900	Ganglioside GM2 activator OS=Homo sapiens GN=GM2A PE=1 SV=4	0	0	0	0	2	0	0	0	0	0.000845143
Q13214	Semaphorin-3B OS=Homo sapiens GN=SEMA3B PE=2 SV=1	0	0	0	4	0	0	0	0	0.000379981	0
Q32P51	Heterogeneous nuclear ribonucleoprotein A1-like 2 OS=Homo sapiens GN=HNRNPA1L2 PE=2 SV=2	4	0	0	0	0	0.00108017	0	0	0	0
P08779	Keratin, type I cytoskeletal 16 OS=Homo sapiens GN=KRT16 PE=1 SV=4	0	0	0	2	0	0	0	0	0.000300851	0
Q9Y4L1	Hypoxia up-regulated protein 1 OS=Homo sapiens GN=HYOU1 PE=1 SV=1	0	0	2	0	0	0	0	0.000139742	0	0
P23588	Eukaryotic translation initiation factor 4B OS=Homo sapiens GN=EIF4B PE=1 SV=2	0	0	0	2	0	0	0	0	0.000232901	0
P09972	Fructose-bisphosphate aldolase C OS=Homo sapiens GN=ALDOC PE=1 SV=2	2	0	0	3	0	0.000474802	0	0	0.000586412	0
P19338	Nucleolin OS=Homo sapiens GN=NCL PE=1 SV=3	0	0	0	2	0	0	0	0	0.000200426	0
Q15365	Poly(rC)-binding protein 1 OS=Homo sapiens GN=PCBP1 PE=1 SV=2	0	0	2	3	0	0	0	0.000392141	0.00059959	0
P10586	Receptor-type tyrosine-protein phosphatase F OS=Homo sapiens GN=PTPRF PE=1 SV=2	0	0	0	5	0	0	0	0	0.000186553	0
P06748	Nucleophosmin OS=Homo sapiens GN=NPM1 PE=1 SV=2	2	0	0	0	0	0.00058785	0	0	0	0
P80303	Nucleobindin-2 OS=Homo sapiens GN=NUCB2 PE=1 SV=2	5	0	0	0	0	0.00102874	0	0	0	0
Q08211	ATP-dependent RNA helicase A OS=Homo sapiens GN=DHX9 PE=1 SV=4	3	0	0	0	0	0.000204128	0	0	0	0
P28482	Mitogen-activated protein kinase 1 OS=Homo sapiens GN=MAPK1 PE=1 SV=3	0	0	3	0	0	0	0	0.000581676	0	0
Q08431	Lactadherin OS=Homo sapiens GN=MFGE8 PE=1 SV=2	0	0	3	0	0	0	0	0.000541094	0	0
P02533	Keratin, type I cytoskeletal 14 OS=Homo sapiens GN=KRT14 PE=1 SV=4	0	0	0	2	0	0	0	0	0.000301489	0
Q9Y5Y6	Suppressor of tumorigenicity 14 protein OS=Homo sapiens GN=ST14 PE=1 SV=2	0	0	0	4	0	0	0	0	0.000332872	0
Q14204	Cytoplasmic dynein 1 heavy chain 1 OS=Homo sapiens GN=DYNC1H1 PE=1 SV=5	2	0	0	0	2	3.71993e-05	0	0	0	3.51082e-05
Q14103	Heterogeneous nuclear ribonucleoprotein D0 OS=Homo sapiens GN=HNRNPD PE=1 SV=1	2	0	0	0	0	0.000486839	0	0	0	0
P37198	Nuclear pore glycoprotein p62 OS=Homo sapiens GN=NUP62 PE=1 SV=3	2	0	0	0	0	0.000331088	0	0	0	0
Q99985	Semaphorin-3C OS=Homo sapiens GN=SEMA3C PE=1 SV=2	0	0	0	4	0	0	0	0	0.000378969	0
Q16630	Cleavage and polyadenylation specificity factor subunit 6 OS=Homo sapiens GN=CPSF6 PE=1 SV=2	0	0	0	0	2	0	0	0	0	0.00029603
P13497	Bone morphogenetic protein 1 OS=Homo sapiens GN=BMP1 PE=1 SV=2	0	0	4	0	0	0	0	0.000283169	0	0
P30530	Tyrosine-protein kinase receptor UFO OS=Homo sapiens GN=AXL PE=1 SV=3	0	0	2	0	0	0	0	0.000156155	0	0
O95967	EGF-containing fibulin-like extracellular matrix protein 2 OS=Homo sapiens GN=EFEMP2 PE=1 SV=3	0	2	0	0	0	0	0.000252039	0	0	0
P68036	Ubiquitin-conjugating enzyme E2 L3 OS=Homo sapiens GN=UBE2L3 PE=1 SV=1	2	0	0	0	0	0.00112226	0	0	0	0
Q92823	Neuronal cell adhesion molecule OS=Homo sapiens GN=NRCAM PE=1 SV=3	4	0	0	0	0	0.000265074	0	0	0	0
Q12907	Vesicular integral-membrane protein VIP36 OS=Homo sapiens GN=LMAN2 PE=1 SV=1	4	0	0	0	0	0.000970944	0	0	0	0
P04155	Trefoil factor 1 OS=Homo sapiens GN=TFF1 PE=1 SV=1	0	0	0	4	0	0	0	0	0.00338816	0
P20142	Gastricsin OS=Homo sapiens GN=PGC PE=1 SV=1	0	0	4	0	0	0	0	0.000719599	0	0
P61916	Epididymal secretory protein E1 OS=Homo sapiens GN=NPC2 PE=1 SV=1	0	0	4	0	0	0	0	0.00184904	0	0
P00441	Superoxide dismutase [Cu-Zn] OS=Homo sapiens GN=SOD1 PE=1 SV=2	0	0	0	3	0	0	0	0	0.00138607	0
Q9Y6G9	Cytoplasmic dynein 1 light intermediate chain 1 OS=Homo sapiens GN=DYNC1LI1 PE=1 SV=3	3	0	0	0	0	0.000495682	0	0	0	0
P15121	Aldose reductase OS=Homo sapiens GN=AKR1B1 PE=1 SV=3	0	0	3	0	0	0	0	0.000662669	0	0
P19105	Myosin regulatory light chain 12A OS=Homo sapiens GN=MYL12A PE=1 SV=2	3	0	0	0	0	0.00151603	0	0	0	0
Q16769	Glutaminyl-peptide cyclotransferase OS=Homo sapiens GN=QPCT PE=1 SV=1	0	0	0	3	0	0	0	0	0.000591286	0
P62263	40S ribosomal protein S14 OS=Homo sapiens GN=RPS14 PE=1 SV=3	0	0	3	0	0	0	0	0.00138678	0	0
P13797	Plastin-3 OS=Homo sapiens GN=PLS3 PE=1 SV=4	0	3	0	0	0	0	0.000265841	0	0	0
O14786	Neuropilin-1 OS=Homo sapiens GN=NRP1 PE=1 SV=3	3	0	0	0	0	0.000280869	0	0	0	0
P03952	Plasma kallikrein OS=Homo sapiens GN=KLKB1 PE=1 SV=1	0	0	3	0	0	0	0	0.000328218	0	0
Q15637	Splicing factor 1 OS=Homo sapiens GN=SF1 PE=1 SV=4	3	0	0	0	0	0.000405699	0	0	0	0
P12035	Keratin, type II cytoskeletal 3 OS=Homo sapiens GN=KRT3 PE=1 SV=3	0	0	0	0	3	0	0	0	0	0.0003896
Q92734	Protein TFG OS=Homo sapiens GN=TFG PE=1 SV=2	3	0	0	0	0	0.000648105	0	0	0	0
P51991	Heterogeneous nuclear ribonucleoprotein A3 OS=Homo sapiens GN=HNRNPA3 PE=1 SV=2	3	0	0	0	0	0.000685825	0	0	0	0
Q01546	Keratin, type II cytoskeletal 2 oral OS=Homo sapiens GN=KRT76 PE=1 SV=2	0	0	0	0	3	0	0	0	0	0.000383493
Q12860	Contactin-1 OS=Homo sapiens GN=CNTN1 PE=1 SV=1	3	0	0	0	0	0.000254658	0	0	0	0
Q9ULI1	Leucine-rich repeat and WD repeat-containing protein KIAA1239 OS=Homo sapiens GN=KIAA1239 PE=2 SV=3	0	0	3	0	0	0	0	0.000120209	0	0
P37802	Transgelin-2 OS=Homo sapiens GN=TAGLN2 PE=1 SV=3	0	0	2	0	0	0	0	0.000701518	0	0
P23470	Receptor-type tyrosine-protein phosphatase gamma OS=Homo sapiens GN=PTPRG PE=1 SV=4	2	0	0	0	0	0.000119604	0	0	0	0
P16152	Carbonyl reductase [NADPH] 1 OS=Homo sapiens GN=CBR1 PE=1 SV=3	2	0	0	0	0	0.000623928	0	0	0	0
P16112	Aggrecan core protein OS=Homo sapiens GN=ACAN PE=1 SV=2	2	0	0	0	0	7.15644e-05	0	0	0	0
P07814	Bifunctional glutamate/proline--tRNA ligase OS=Homo sapiens GN=EPRS PE=1 SV=5	0	0	2	0	0	0	0	9.23295e-05	0	0
P52272	Heterogeneous nuclear ribonucleoprotein M OS=Homo sapiens GN=HNRNPM PE=1 SV=3	2	0	0	0	0	0.000236751	0	0	0	0
P21926	CD9 antigen OS=Homo sapiens GN=CD9 PE=1 SV=4	0	0	0	0	0	0	0	0	0	0
P11277	Spectrin beta chain, erythrocytic OS=Homo sapiens GN=SPTB PE=1 SV=5	2	0	0	0	0	8.08741e-05	0	0	0	0
P54802	Alpha-N-acetylglucosaminidase OS=Homo sapiens GN=NAGLU PE=1 SV=2	0	0	2	0	0	0	0	0.00018789	0	0
P19022	Cadherin-2 OS=Homo sapiens GN=CDH2 PE=1 SV=4	2	0	0	0	0	0.000190759	0	0	0	0
O00622	Protein CYR61 OS=Homo sapiens GN=CYR61 PE=1 SV=1	0	0	2	0	0	0	0	0.00036641	0	0
O00560	Syntenin-1 OS=Homo sapiens GN=SDCBP PE=1 SV=1	2	0	0	0	0	0.00057996	0	0	0	0
P60842	Eukaryotic initiation factor 4A-I OS=Homo sapiens GN=EIF4A1 PE=1 SV=1	0	0	2	0	0	0	0	0.000343848	0	0
P60866	40S ribosomal protein S20 OS=Homo sapiens GN=RPS20 PE=1 SV=1	2	0	0	0	0	0.00145234	0	0	0	0
Q16674	Melanoma-derived growth regulatory protein OS=Homo sapiens GN=MIA PE=1 SV=1	2	0	0	0	0	0.0013193	0	0	0	0
Q01085	Nucleolysin TIAR OS=Homo sapiens GN=TIAL1 PE=1 SV=1	2	0	0	0	0	0.000460875	0	0	0	0
P13591	Neural cell adhesion molecule 1 OS=Homo sapiens GN=NCAM1 PE=1 SV=3	2	0	0	0	0	0.000201431	0	0	0	0
O95302	Peptidyl-prolyl cis-trans isomerase FKBP9 OS=Homo sapiens GN=FKBP9 PE=1 SV=2	2	0	0	0	0	0.000303207	0	0	0	0
P62917	60S ribosomal protein L8 OS=Homo sapiens GN=RPL8 PE=1 SV=2	2	0	0	0	0	0.000672482	0	0	0	0
Q15811	Intersectin-1 OS=Homo sapiens GN=ITSN1 PE=1 SV=3	0	2	0	0	0	0	6.4877e-05	0	0	0
P17936	Insulin-like growth factor-binding protein 3 OS=Homo sapiens GN=IGFBP3 PE=1 SV=2	0	2	0	0	0	0	0.000383688	0	0	0
P46109	Crk-like protein OS=Homo sapiens GN=CRKL PE=1 SV=1	2	0	0	0	0	0.000570389	0	0	0	0
Q6Y7W6	PERQ amino acid-rich with GYF domain-containing protein 2 OS=Homo sapiens GN=GIGYF2 PE=1 SV=1	0	0	0	2	0	0	0	0	0.000109548	0
P24844	Myosin regulatory light polypeptide 9 OS=Homo sapiens GN=MYL9 PE=1 SV=4	2	0	0	0	0	0.00100481	0	0	0	0
P10599	Thioredoxin OS=Homo sapiens GN=TXN PE=1 SV=3	0	2	0	0	0	0	0.00106336	0	0	0
Q96AE4	Far upstream element-binding protein 1 OS=Homo sapiens GN=FUBP1 PE=1 SV=3	2	0	0	0	0	0.000268366	0	0	0	0
P14314	Glucosidase 2 subunit beta OS=Homo sapiens GN=PRKCSH PE=1 SV=2	2	0	0	0	0	0.000327326	0	0	0	0
P06753	Tropomyosin alpha-3 chain OS=Homo sapiens GN=TPM3 PE=1 SV=2	2	0	0	0	0	0.000606414	0	0	0	0
Q12904	Aminoacyl tRNA synthase complex-interacting multifunctional protein 1 OS=Homo sapiens GN=AIMP1 PE=1 SV=2	0	0	0	2	0	0	0	0	0.000456099	0
Q92922	SWI/SNF complex subunit SMARCC1 OS=Homo sapiens GN=SMARCC1 PE=1 SV=3	2	0	0	0	0	0.000156405	0	0	0	0
Q9NZI8	Insulin-like growth factor 2 mRNA-binding protein 1 OS=Homo sapiens GN=IGF2BP1 PE=1 SV=2	2	0	0	0	0	0.000299529	0	0	0	0
Q92520	Protein FAM3C OS=Homo sapiens GN=FAM3C PE=1 SV=1	0	0	2	0	0	0	0	0.000614988	0	0
Q14978	Nucleolar and coiled-body phosphoprotein 1 OS=Homo sapiens GN=NOLC1 PE=1 SV=2	2	0	0	0	0	0.00024725	0	0	0	0
Q9Y265	RuvB-like 1 OS=Homo sapiens GN=RUVBL1 PE=1 SV=1	2	0	0	0	0	0.000379009	0	0	0	0
Q9UK41	Vacuolar protein sorting-associated protein 28 homolog OS=Homo sapiens GN=VPS28 PE=1 SV=1	0	0	0	0	2	0	0	0	0	0.000738066
